# Supplementary material
Source: PubMed Central journal article supplement (PMC5539356)
Supplement: cr201794x2.pdf [file cr201794x2.pdf]

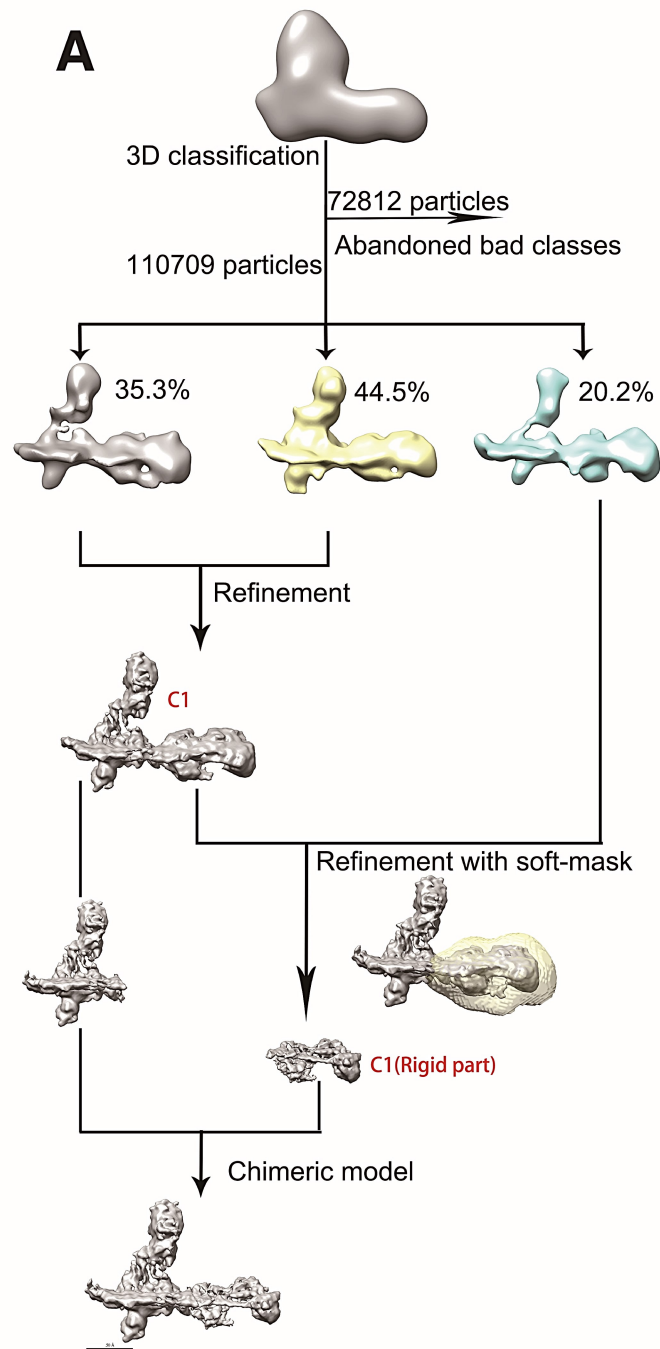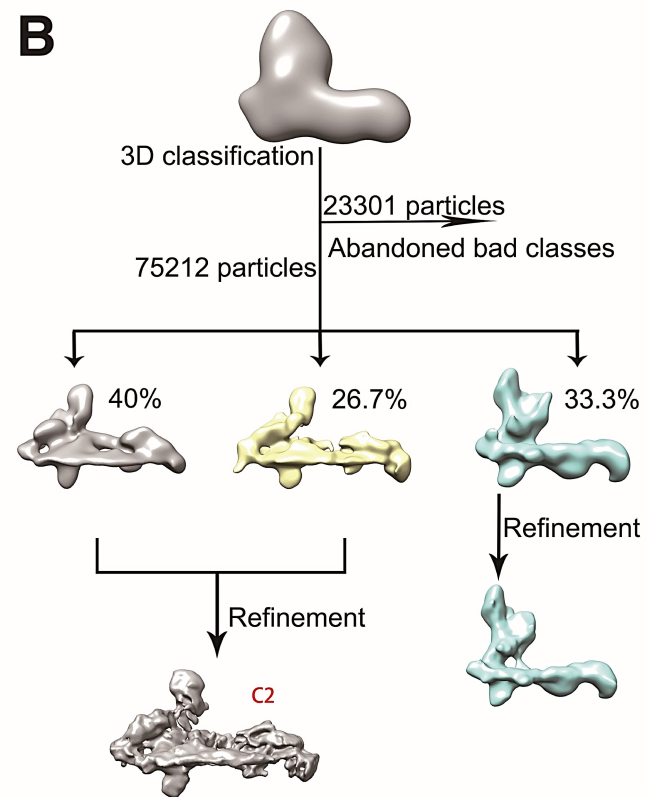

**Figure S2 Work-flow of 3D analysis of C1 and C2. (A, B)** The architectural model obtained from negative staining was used as the initial model with low-pass filtering to 60 Å for both C1 and C2. The total dataset was classified into three portions, and then the particles in two of the portions (grey and yellow) were combined and refined. For C1 **(A)**, the rigid part was masked out (by the yellow transparent shell) and further refined with the total data set. Next, the rigid part with improved resolution was superimposed onto the refined holo-C1 to generate the chimeric model. For C2 **(B)**, the rigid part of the refined holo-model was further refined with a soft mask (the yellow transparent shell), and the third portion (blue) in the 3D classification was also further refined.
