# Supplementary material
Source: PubMed Central journal article supplement (PMC5539356)
Supplement: cr201794x3.pdf [file cr201794x3.pdf]

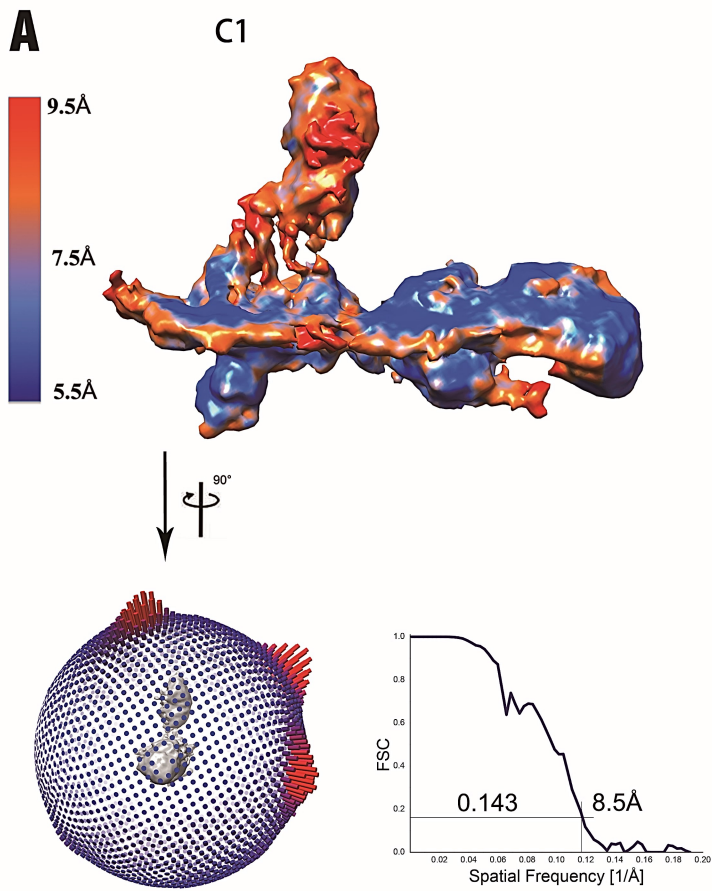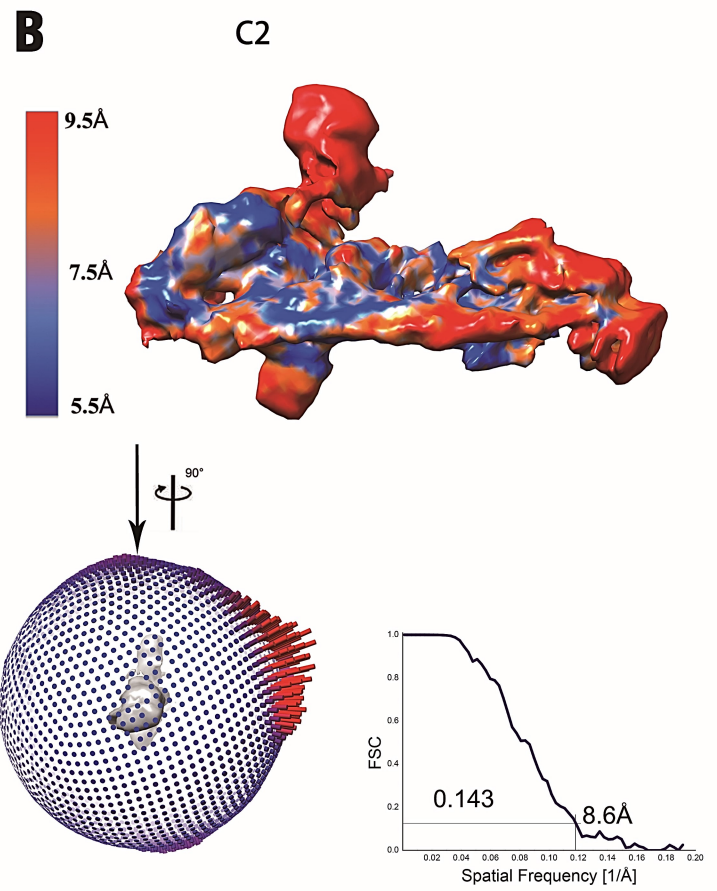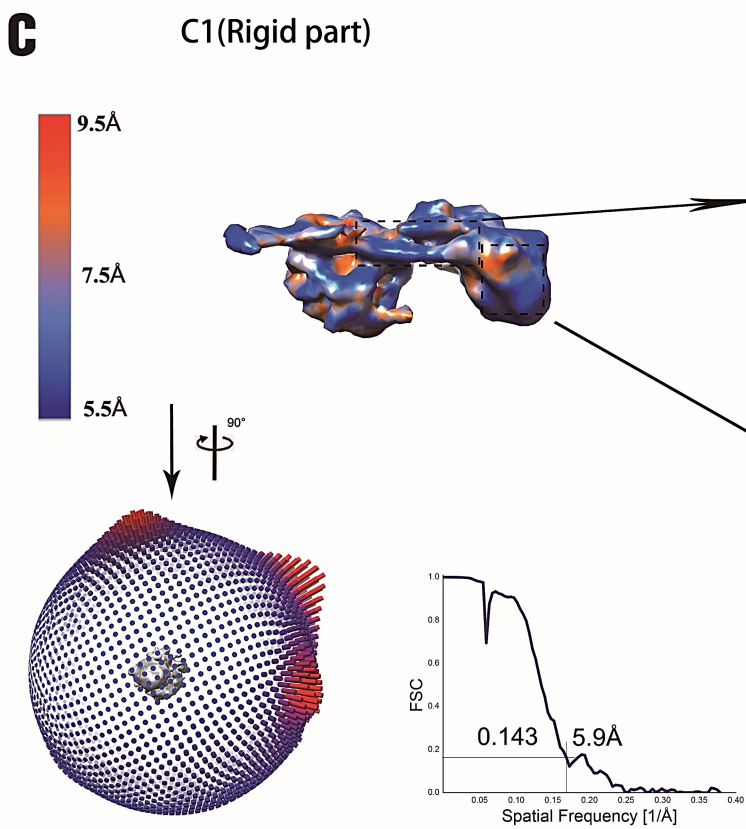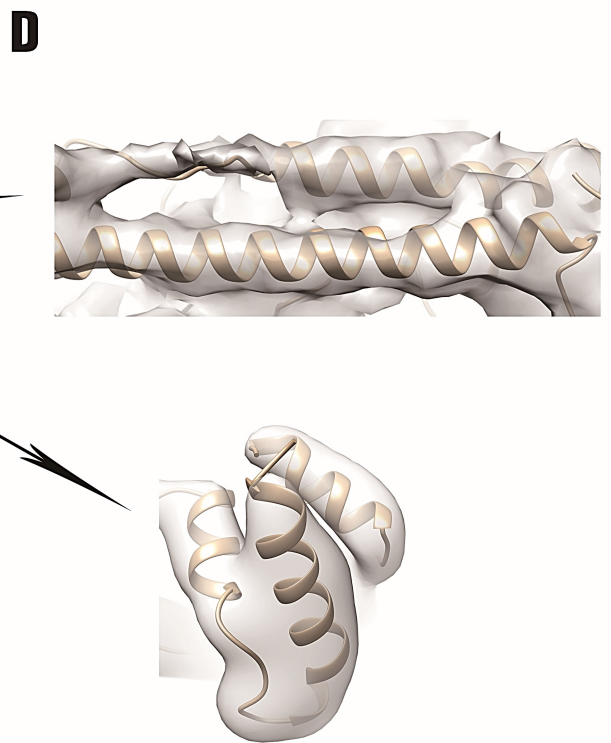

**Figure S3 Resolution of 3D reconstructions of C1 and C2.** (A-C) Local resolution map, Euler angle distribution map and the Fourier shell correlation (FSC) curve of C1, C2 and the rigid part in C1 are shown. The resolution range was calculated from 5.5 to 9.5 Å. The resolutions at 0.143 in FSC curve are 8.5 Å for C1, 8.6 Å for C2 and 5.9 Å for the rigid part in C1, respectively. (D) Two selected areas are magnified and shown with the docked atomic models for C1.
