# Supplementary material
Source: PubMed Central journal article supplement (PMC5539356)
Supplement: cr201794x6.pdf [file cr201794x6.pdf]

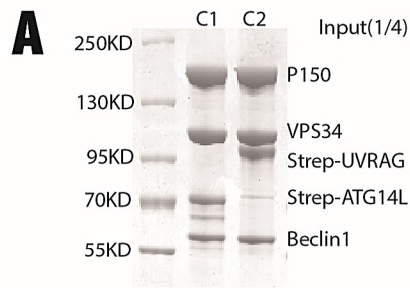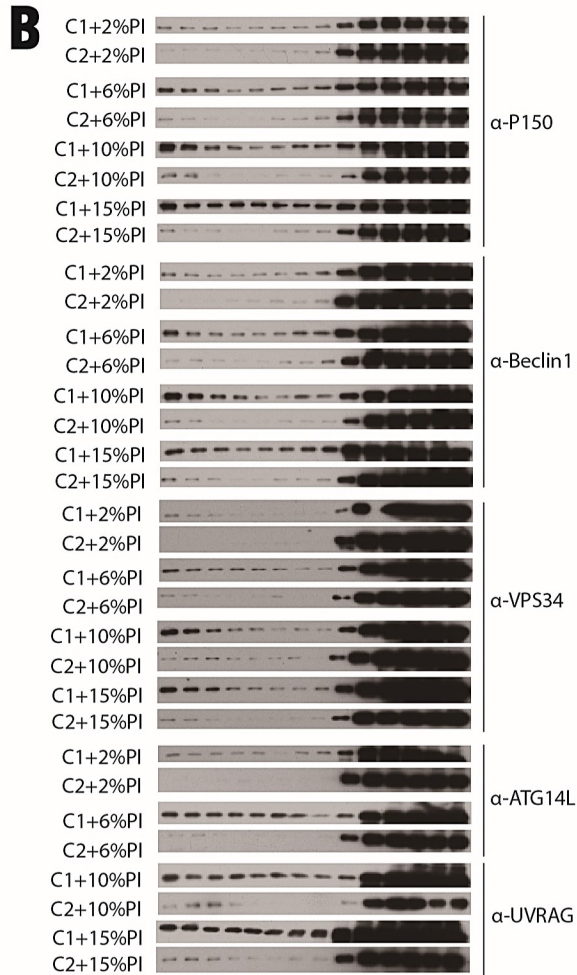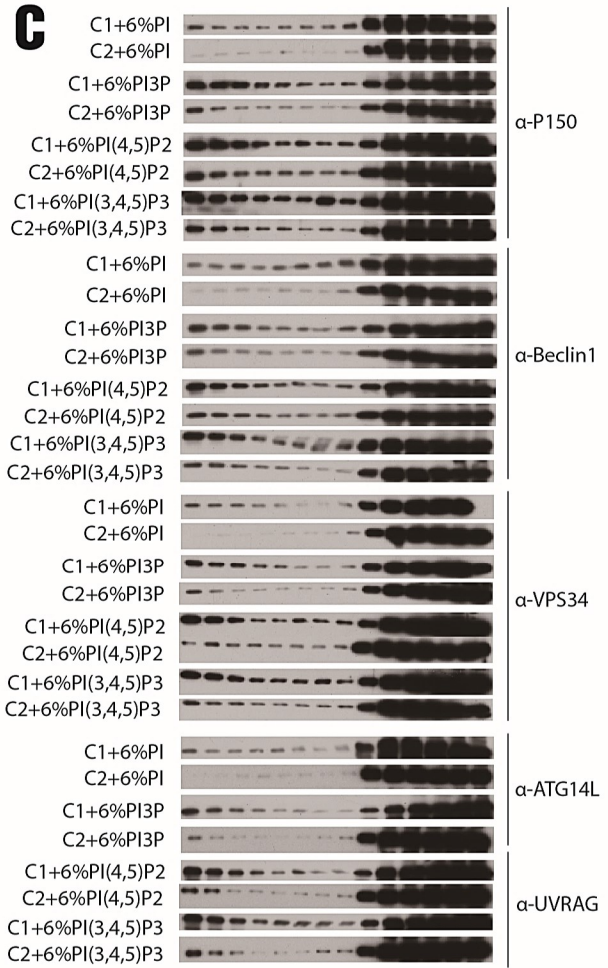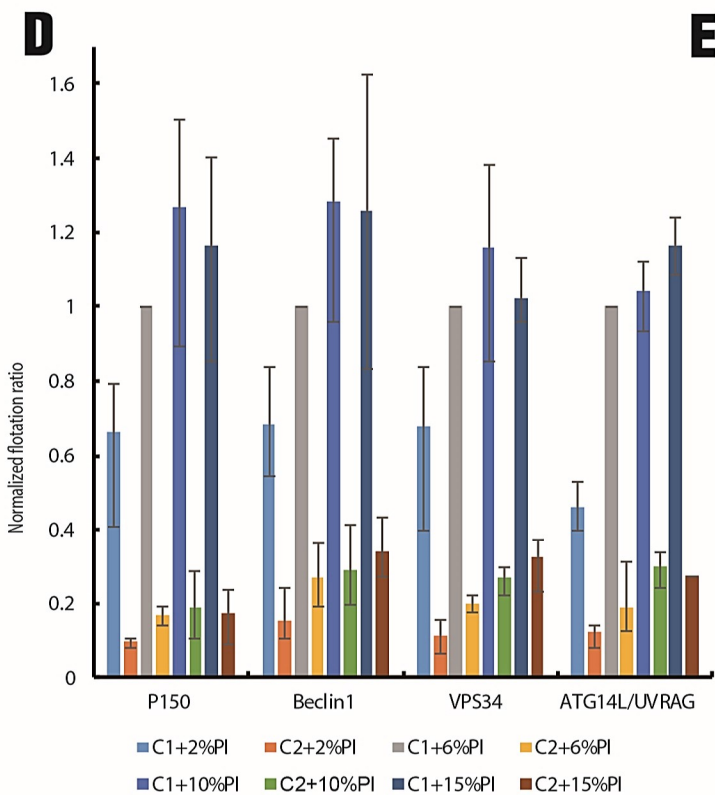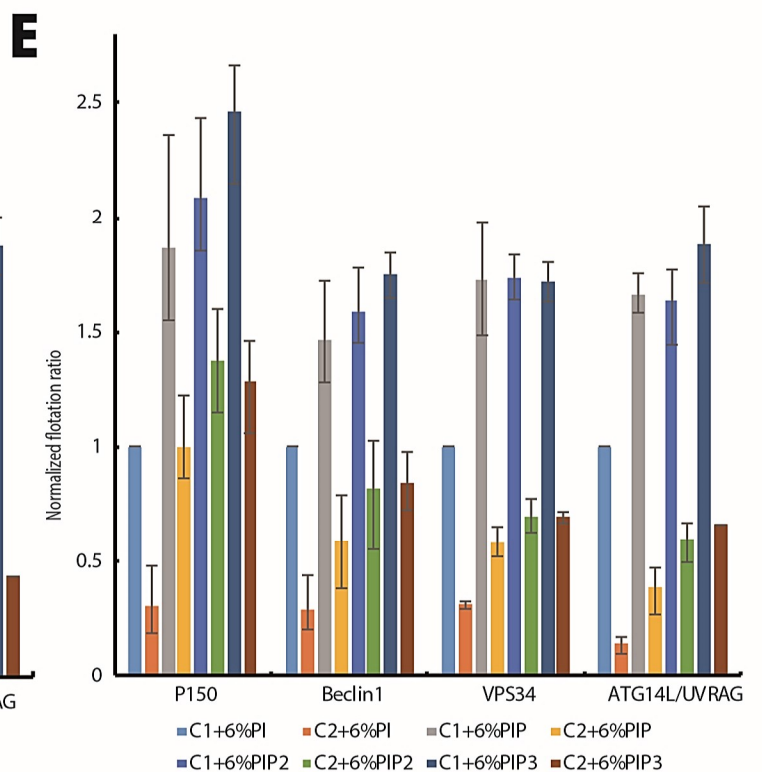

**Figure S6 The membrane binding ability of C2 is much weaker than C1. (A)** Flotation assay to examine the interaction of C1 and C2 with liposomes containing 2%, 6%, 10% or 15% PI in a sucrose gradient (from top to bottom: 0, 20%, 25%, 30%). All 14 fractions from top to bottom were analyzed by immunoblotting using antibodies against P150, VPS34, ATG14L, UVRAG or Beclin1. **(B)** The flotation ratio from **A** for P150, VPS34, ATG14L/UVRAG and Beclin1 was calculated by dividing the input with the top 8 fractions, then normalizing to the value for C1 (6% PI). Data are represented as mean  $\pm$  SD (n = 3). **(C)** Flotation assay to examine the interaction of C1 and C2 with liposomes containing 6% PI, 6% PI3P, 6% PI(4,5)P2 or 6% PI(3,4,5)-containing liposomes in a sucrose gradient (from top to bottom: 0, 20%, 25%, 30%). All 14 fractions from top to bottom were analyzed by immunoblotting using antibodies against P150, VPS34, ATG14L, UVRAG or Beclin1. **(D)** The flotation ratio from **C** for P150, VPS34, ATG14L/UVRAG and Beclin1 was calculated by dividing the input with the top 8 fractions, then normalizing to the value for C1 (6% PI). Data are represented as mean  $\pm$  SD (n = 3). **(E)** 1/4 of the protein input for the flotation assays shown in **A** and **B**.
